# Supplementary material for: Effect of Gut Microbiota Biotransformation on Dietary Tannins and Human Health Implications
Source: MDPI journal article supplement (doi:10.3390/microorganisms9050965), 2021-04-29
Supplement: s1 [file s1]

---

## Effect of Gut Microbiota Biotransformation on Dietary Tannins and Human Health Implications

Ibrahim E. Sallam <sup>1</sup>, Amr Abdelwareth <sup>2</sup>, Heba Attia <sup>3</sup>, Ramy K. Aziz <sup>3,4</sup>, Masun Nabhan Homsy <sup>5</sup>, Martin von Bergen <sup>5,6,\*</sup> and Mohamed A. Farag <sup>7,\*</sup>

<sup>1</sup> Pharmacognosy Department, Faculty of Pharmacy, October University for Modern Sciences and Arts (MSA), 12566 6<sup>th</sup> of October City, Egypt; iezz@msa.eun.eg

<sup>2</sup> Chemistry Department, School of Sciences & Engineering, The American University in Cairo, 11835 New Cairo, Egypt; amr.abdelwareth@aucegypt.edu

<sup>3</sup> Department of Microbiology and Immunology, Faculty of Pharmacy, Cairo University, 11562 Cairo, Egypt; heba.mohamed@pharma.cu.edu.eg (H.A.); ramy.aziz@gmail.com (R.K.A.)

<sup>4</sup> Microbiology and Immunology Research Program, Children's Cancer Hospital Egypt 57357, 11617 Cairo, Egypt

<sup>5</sup> Helmholtz-Centre for Environmental Research-UFZ GmbH, Department of Molecular Systems Biology, 04318 Leipzig, Germany; masun.homsy@ufz.de

<sup>6</sup> Institute of Biochemistry, Faculty of Life Sciences, University of Leipzig, Talstraße 33, 04103 Leipzig, Germany

<sup>7</sup> Pharmacognosy Department, Faculty of Pharmacy, Cairo University, 11562 Cairo, Egypt

\* Correspondence: martin.vonbergen@ufz.de (M.v.B.); mohamed.farag@pharma.cu.edu.eg (M.A.F.)

---

## Supplementary File

---

### Contents:

**Table S1:** Predictive Model Performances (means of ROC-AUC-score)

**Table S2:** Neural network architecture and parameters

**Figure S1:** Chemical features of gut-biotransformed tannin metabolites vs. anti-inflammatory health effect

**Figure S2:** Chemical features of gut-biotransformed tannin metabolites vs. antioxidant health effect

**Figure S3:** Chemical features of gut-biotransformed tannin metabolites vs. anticancer health effect

**Figure S4:** Chemical features of gut-biotransformed tannin metabolites vs. anti-atherosclerotic health effect

**Table S1. Predictive Model Performances (means of ROC-AUC-score)**

| Biological Effect    | Training (%) | Testing (%) |
|----------------------|--------------|-------------|
| Anti-Inflammatory    | 99.81        | 83.28       |
| Antioxidant          | 99.93        | 83.42       |
| Anticancer           | 99.90        | 88.83       |
| Anti-atherosclerotic | 99.99        | 86.44       |

**Table S2. Neural network architecture and parameters**

|                     |                               |
|---------------------|-------------------------------|
| Classifier          | dc.models.MultitaskClassifier |
| n_features          | 1024                          |
| layer_sizes         | [500, 1000]                   |
| dropouts            | [.1]                          |
| learning_rate       | 0.001                         |
| weight_init_stddevs | [0.2]                         |
| batch_size          | 311                           |
| optimizer           | Adam( beta1=0.9, beta2=0.999) |

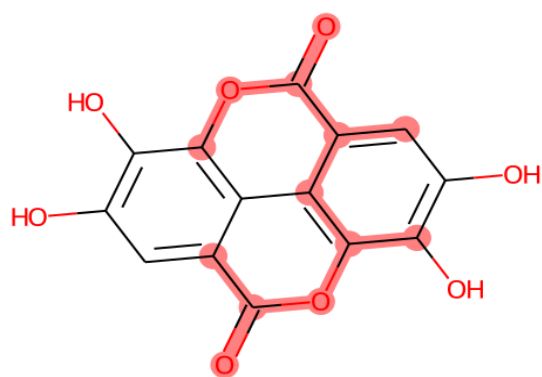

Ellagic acid

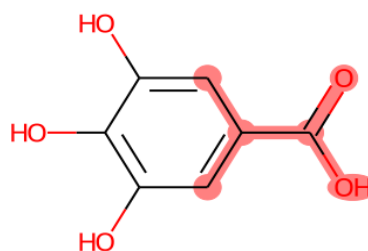

Gallic acid

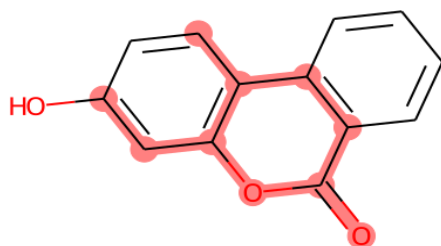

Urolithin B

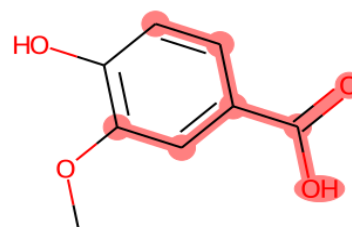

Vanillic acid

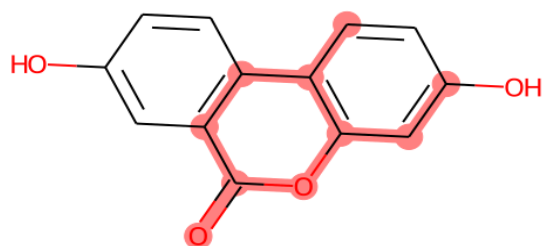

Urolithin A

**Figure S1.** Chemical features of gut-biotransformed tannin metabolites vs. anti-inflammatory health effect

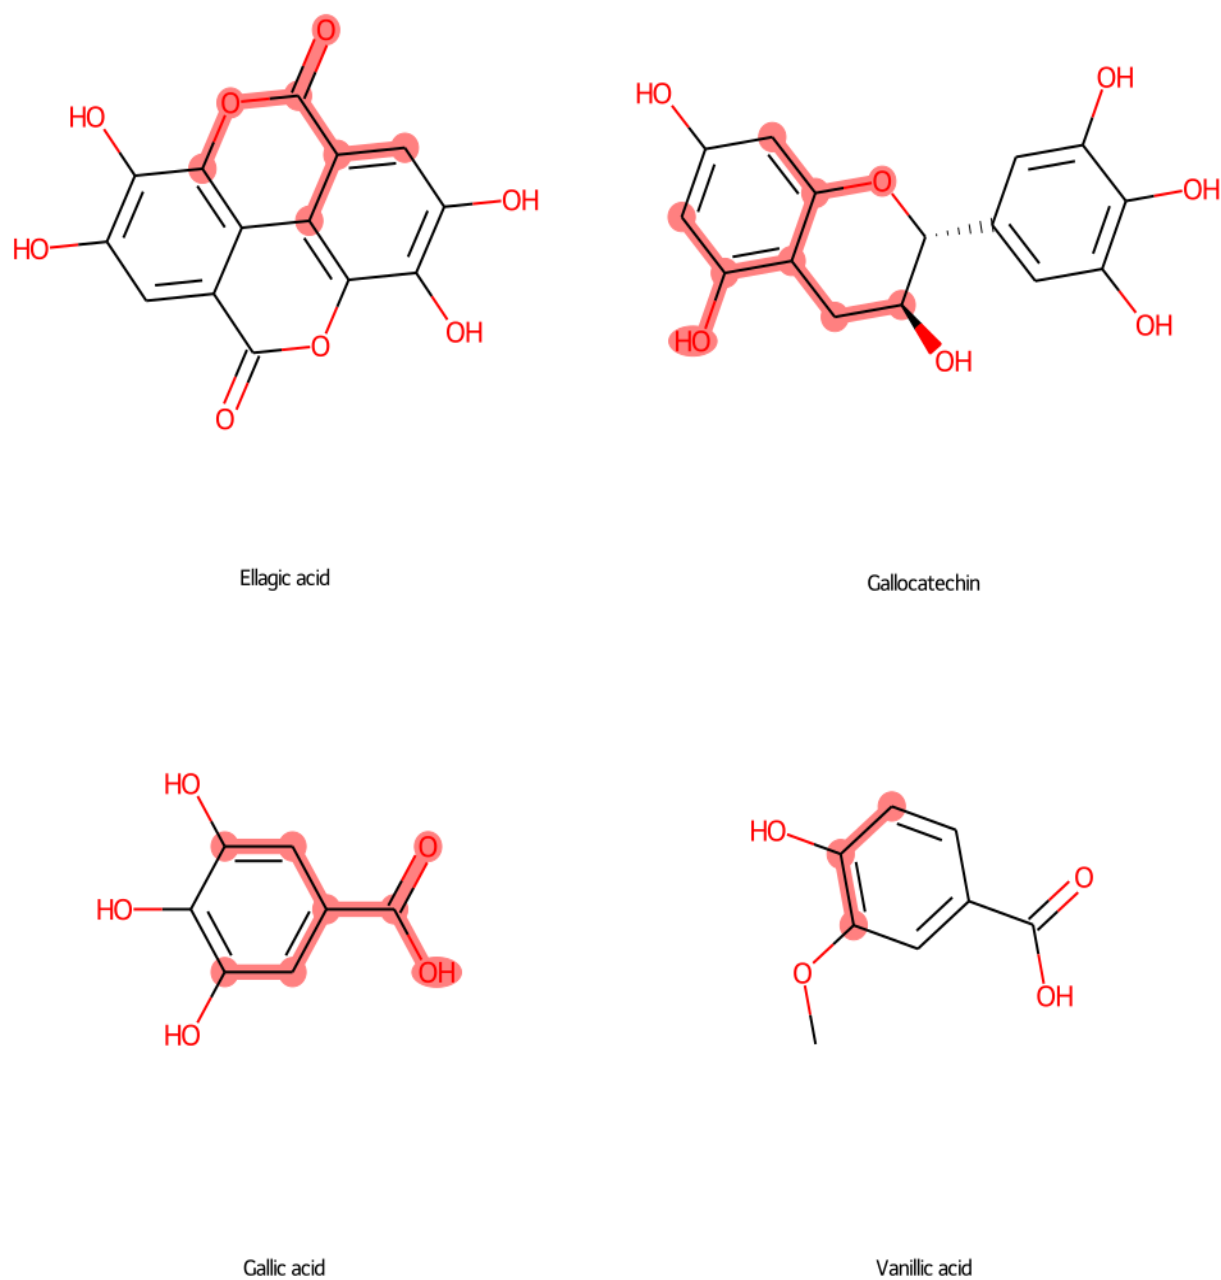

**Figure S2.** Chemical features of gut-biotransformed tannin metabolites vs. antioxidant health effect

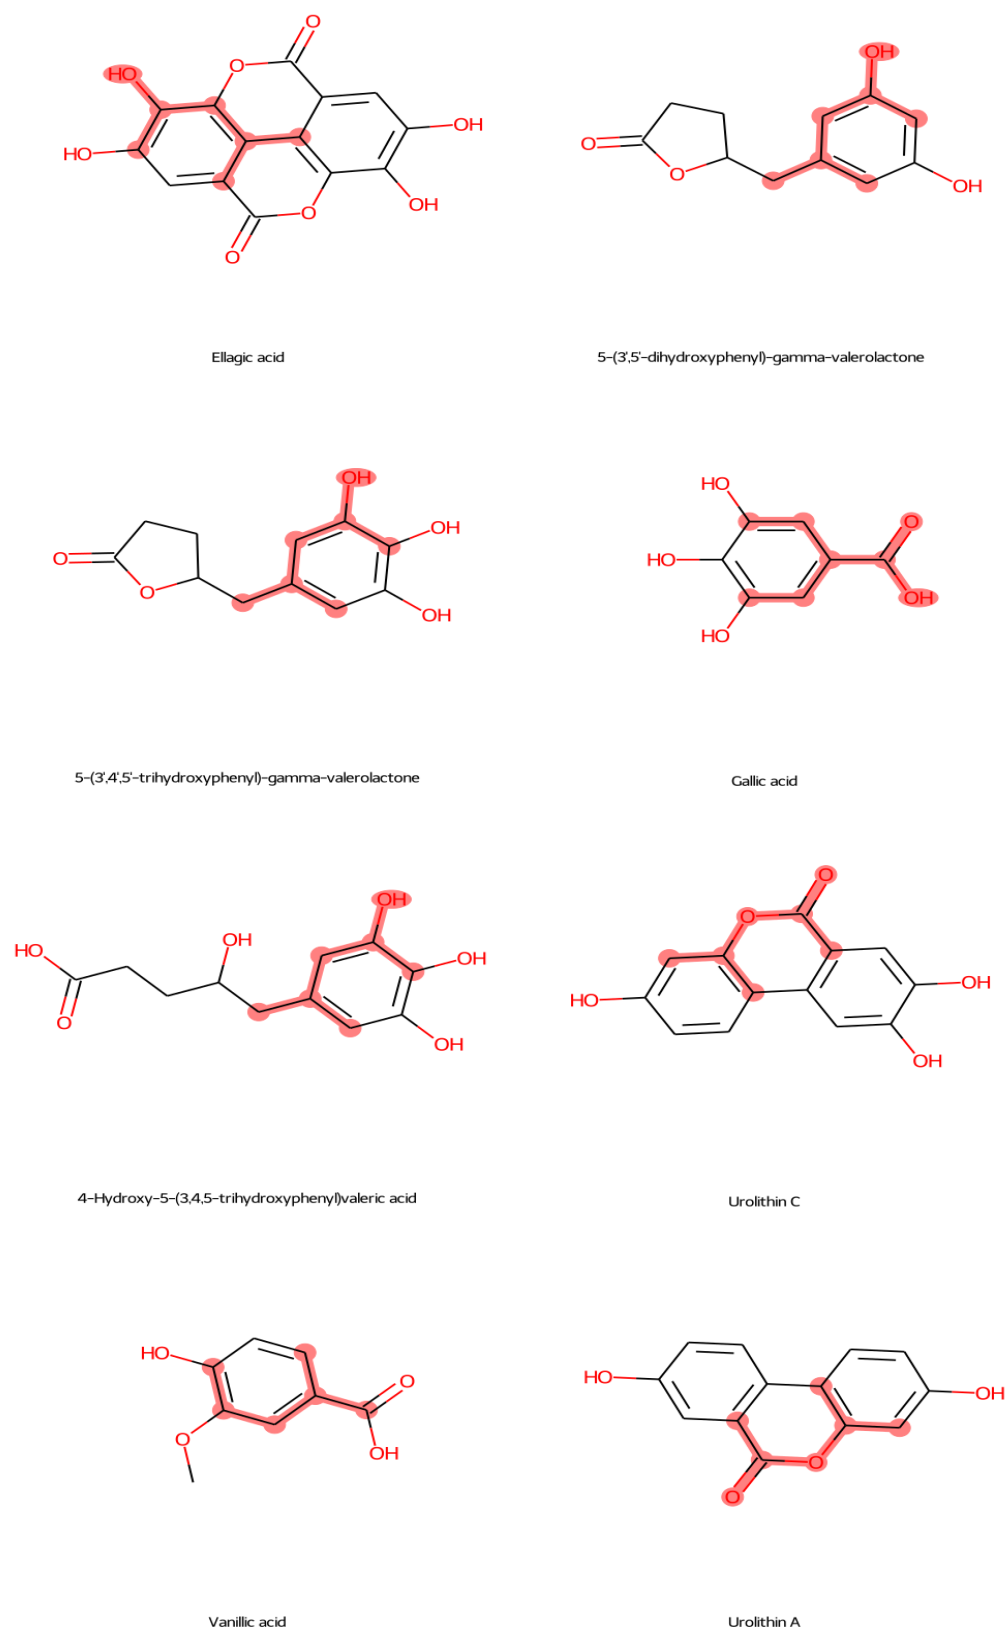

**Figure S3.** Chemical features of gut-biotransformed tannin metabolites vs. anticancer health effect

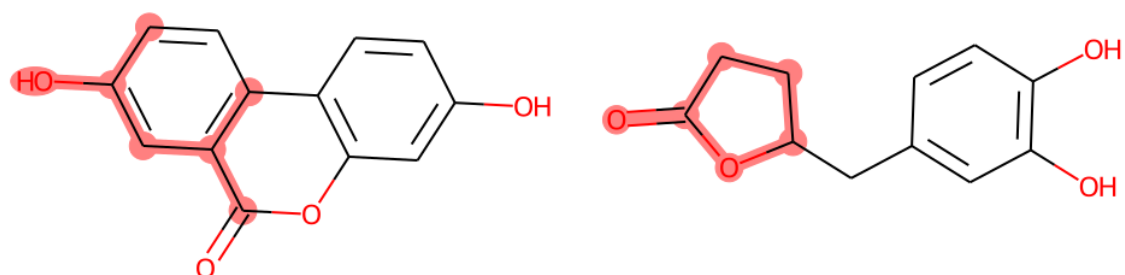

Urolithin A

5-(3,4'-Dihydroxyphenyl)-gamma-valerolactone

**Figure S4.** Chemical features of gut-biotransformed tannin metabolites vs. anti-atherosclerotic health effect
